# Supplementary material for: Atlantic water flow through the Faroese Channels
Source: Copernicus journal article supplement (doi:10.5194/os-2017-47), 2017-06-13
Supplement: Supplementary file 1 [file os-2017-47-supplement.pdf]

Table S1. Selected mooring sites of traditional (Aanderaa) current meters with number of deployments (Depl), total number of days with good data (Days), position and bottom depth (Botm), and magnitude (Speed) and direction (Dir) of the velocity at 40 m depth.

| Site | Depl | Days | Position |         | Botm<br>m | Speed<br>cm s <sup>-1</sup> | Dir<br>° |
|------|------|------|----------|---------|-----------|-----------------------------|----------|
|      |      |      | Latit.   | Longit. |           |                             |          |
| CF   | 1    | 60   | 61.157   | -8.190  | 119       | 17.9                        | 134      |
| CW   | 7    | 831  | 61.717   | -7.483  | 148       | 6.6                         | 340      |
| CS   | 6    | 854  | 61.200   | -6.500  | 140       | 12.6                        | 166      |
| CE   | 14   | 2035 | 61.788   | -6.200  | 120       | 12.3                        | 196      |

Table S2. Selected ADCP sites with number of deployments (Depl), total number of days with good data (Days), position and bottom depth (Botm), and magnitude (Speed), direction (Dir), and stability (Stab) of the velocity at the depth indicated in column “Depth”. The stability is the magnitude of the average velocity vector divided by the averaged velocity magnitude for each day so that a completely uni-directional flow (discounting tides) will have a stability of 100%.

| Site | Depl | Days | Position |         | Botm<br>m | Depth<br>m | Speed<br>cm s <sup>-1</sup> | Dir<br>° | Stab<br>% |
|------|------|------|----------|---------|-----------|------------|-----------------------------|----------|-----------|
|      |      |      | Latit.   | Longit. |           |            |                             |          |           |
| EB   | 2    | 456  | 61.6034  | -4.3366 | 787       | 200        | 12.1                        | 202      | 68        |
| SA   | 4    | 1106 | 61.0000  | -5.8567 | 293       | 200        | 3.3                         | 196      | 48        |
| SB   | 15   | 4312 | 60.7830  | -5.3000 | 786       | 200        | 3.2                         | 173      | 18        |
| SX   | 2    | 693  | 60.8612  | -5.4958 | 546       | 200        | 8.9                         | 226      | 58        |
| SY   | 3    | 951  | 60.7183  | -5.0983 | 897       | 200        | 7.4                         | 169      | 35        |
| SC   | 16   | 5003 | 60.5660  | -4.7663 | 1071      | 200        | 7.7                         | 112      | 33        |
| SD   | 31*  | 4519 | 60.4410  | -4.3620 | 801       | 200        | 19.5                        | 67       | 67        |
| SE   | 38*  | 5235 | 60.2830  | -4.3010 | 447       | 200        | 22.7                        | 56       | 94        |
| ZQ   | 1    | 257  | 60.8335  | -6.3925 | 169       | 100        | 5.6                         | 235      | 55        |
| ZA   | 2    | 684  | 60.3883  | -6.1600 | 417       | 200        | 0.5                         | 213      | 3         |
| ZB   | 2    | 599  | 60.2283  | -6.1667 | 1139      | 200        | 9.2                         | 68       | 42        |
| ZC   | 1    | 256  | 60.0683  | -6.1683 | 1080      | 200        | 22.7                        | 92       | 79        |
| ZE   | 1    | 145  | 59.9060  | -6.1670 | 775       | 200        | 16.4                        | 119      | 79        |
| FG   | 1    | 364  | 61.4710  | -8.2208 | 561       | 200        | 8.2                         | 301      | 43        |
| FB   | 20   | 6762 | 61.4159  | -8.2833 | 809       | 400        | 2.6                         | 350      | 17        |
| FC   | 15   | 4007 | 61.3935  | -8.3160 | 836       | 300        | 10.8                        | 126      | 68        |

\*Includes ADCP data from the North West Approaches Group.

Table S3. Correlation coefficients between weekly averaged along-channel velocities from all pairs of simultaneous ADCP deployments over the Faroese slope. The terms „Upstream“ and „Downstream“ refer to a flow direction from the FSC towards the FBC. Each deployment is characterized by the site (Figure 2 in manuscript), the selected depth, and the along-channel direction („tow.“ = „toward“). „Days“ indicates the number of values before averaging. None of the correlation coefficients are statistically significant.

| Upstream ADCP      |  | Downstream ADCP    |  | Period (yyyymmdd) | Days | Corr. coeff. |
|--------------------|--|--------------------|--|-------------------|------|--------------|
| EB 193 m tow. 218° |  | SB 192 m tow. 218° |  | 19990706-20000616 | 346  | +0.22        |
| SB 196 m tow. 218° |  | ZA 197 m tow. 270° |  | 20110612-20120517 | 340  | +0.00        |
| SB 196 m tow. 218° |  | ZB 200 m tow. 270° |  | 20110905-20120517 | 255  | +0.03        |
| SB 191 m tow. 218° |  | FG 192 m tow. 304° |  | 20080608-20090515 | 341  | +0.11        |
| ZA 197 m tow. 270° |  | FB 417 m tow. 304° |  | 20110613-20120517 | 339  | -0.16        |
| ZA 197 m tow. 270° |  | FC 376 m tow. 304° |  | 20110613-20120517 | 339  | -0.15        |
| ZA 197 m tow. 270° |  | FB 346 m tow. 304° |  | 20130608-20140515 | 341  | -0.07        |
| ZA 197 m tow. 270° |  | FC 342 m tow. 304° |  | 20130608-20140515 | 341  | -0.04        |

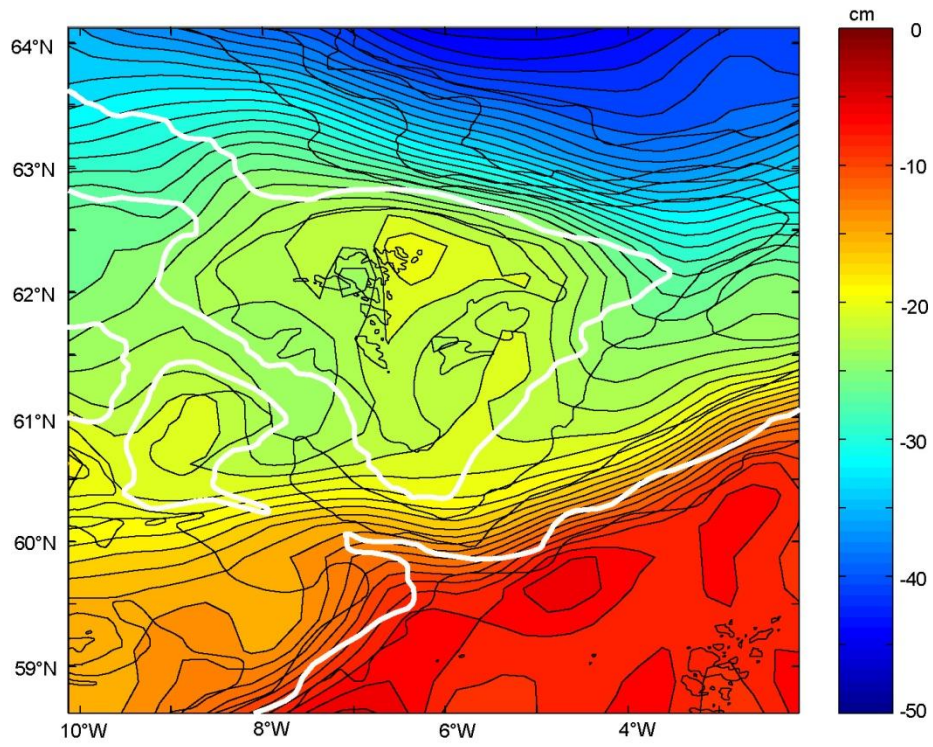

**Figure S1.** Mean Dynamic Topography (MDT) in the region. The bottom topography is shown by thin black lines with the 500 m bottom contour in white.

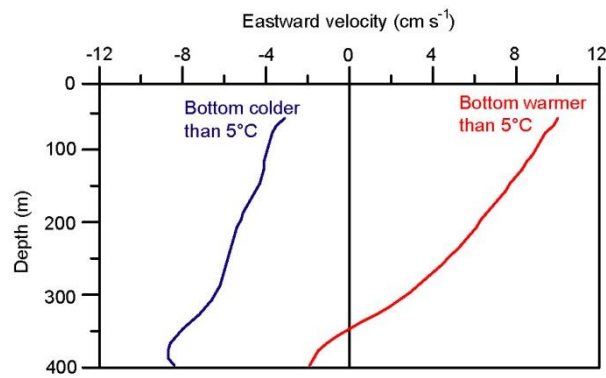

**Figure S2.** Average velocity profiles at site ZA (bottom depth 416 m) during the two deployments split into periods with bottom temperature below (blue, 389 days) and above (red, 295 days) 5 °C.

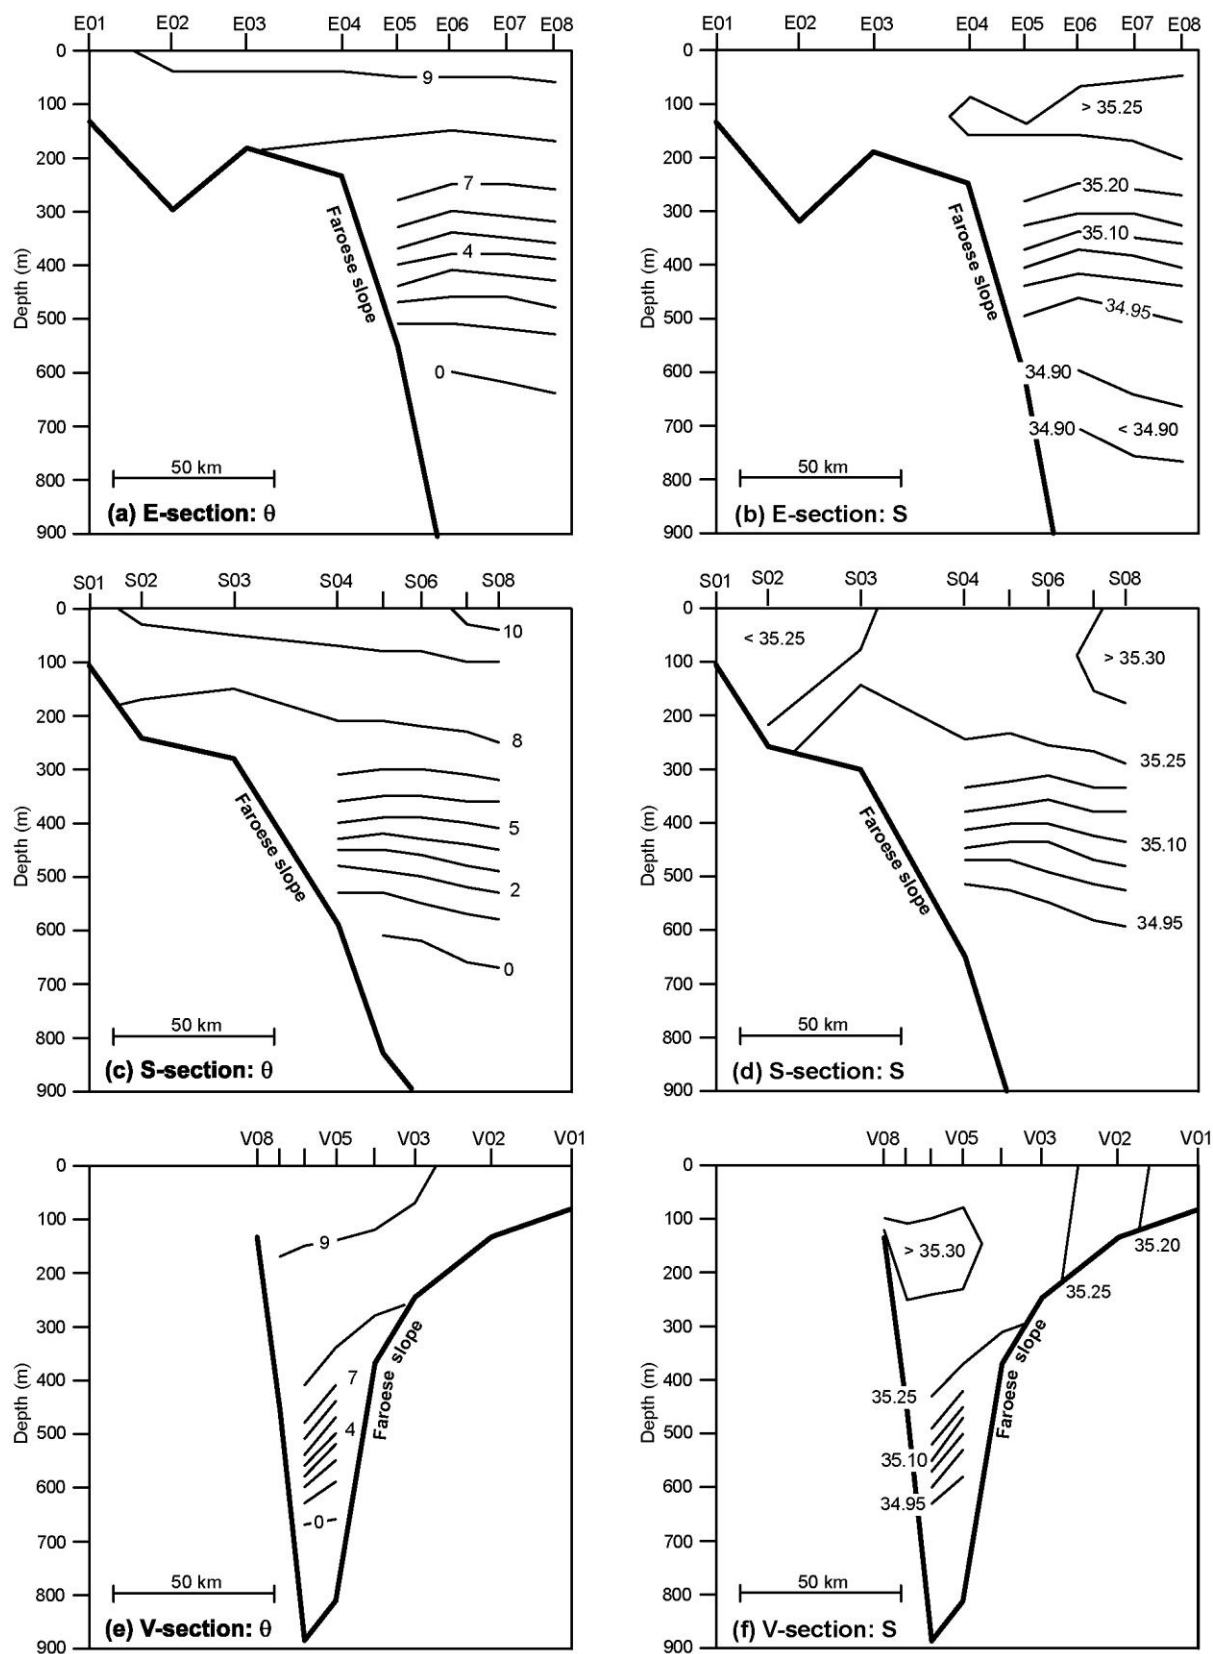

**Figure S3.** Average distributions of potential temperature ( $\theta$ , **a**, **c**, **e**) and salinity (S, **b**, **d**, **f**) on three sections (Figure 2a in manuscript) showing the 8 closest standard stations to the Faroes for each section. Based on 47 cruises by R/V Magnus Heinason 1996-2015, on which all three sections were occupied within one week.

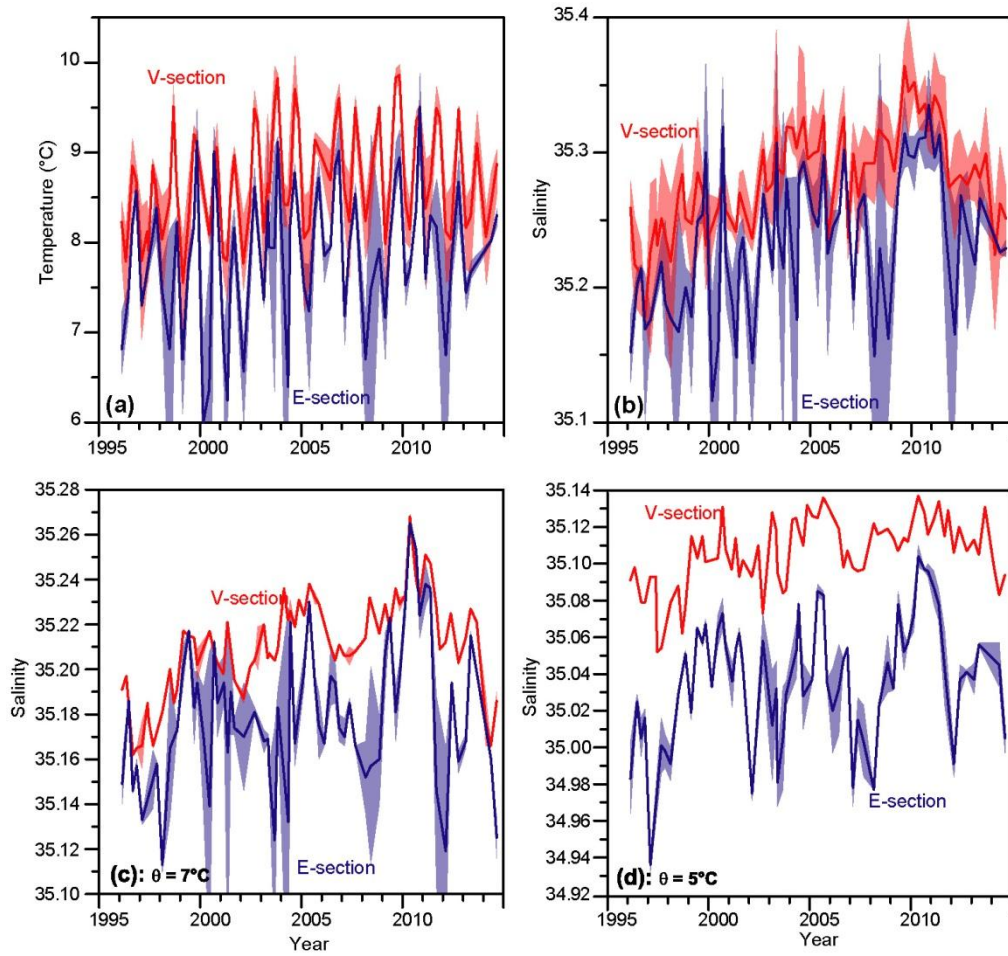

**Figure S4.** Water mass comparison between water over the Faroese slopes in the FBC (V-section) and the FSC (E-section), respectively (Figure 2a in the manuscript). The top two panels compare temperature (a) and salinity (b) averaged between 100 m and 200 m depth for three standard stations (V03, V04, V05 with bottom depths 239 m, 354 m, 807 m) on the V-section (red) with three stations (E04, E05, E06 with bottom depths 230 m, 539 m, 988 m) on the E-section (blue). The bottom panels show salinities at fixed potential temperatures 7 °C (c) and 5 °C (d) for the same stations. In each case, the average of the three stations for each cruise is shown by the thick red/blue line surrounded by a red/blue area indicating the range from minimum to maximum. To enhance visibility of differences, temperatures less than 6 °C and salinities less than 35.1 have been clipped in panels a, b, and c.

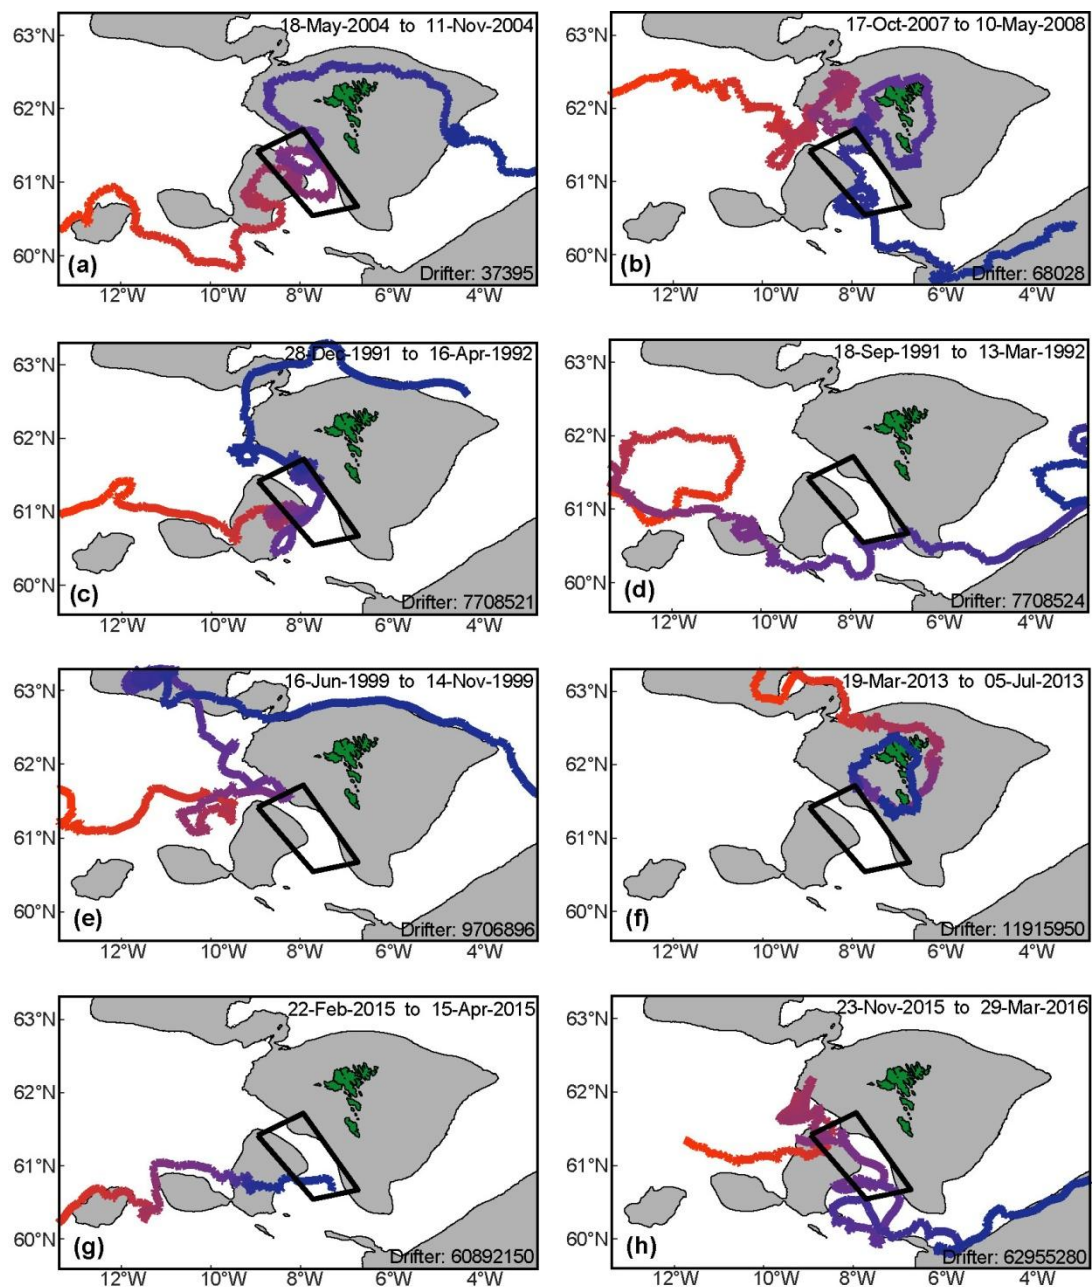

**Figure S5.** Tracks of all the surface drifters that entered the Faroe Bank Channel, here defined by the black polygon shown on each panel. The tracks are colour-coded with time so that they are red in the beginning, turning to blue at the end.



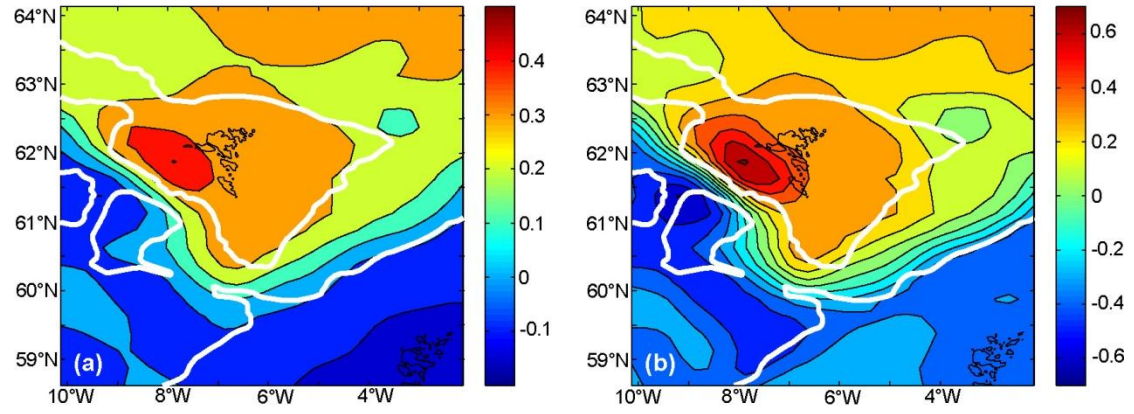

**Figure S6.** The difference between using SLA and SLA\*. **(a)** Correlation coefficient between  $\Delta SLA_{FBC}$  and SLA at all grid points of the region. **(b)** Correlation coefficient between  $\Delta SLA_{FBC}$  and SLA\* at all grid points of the region.

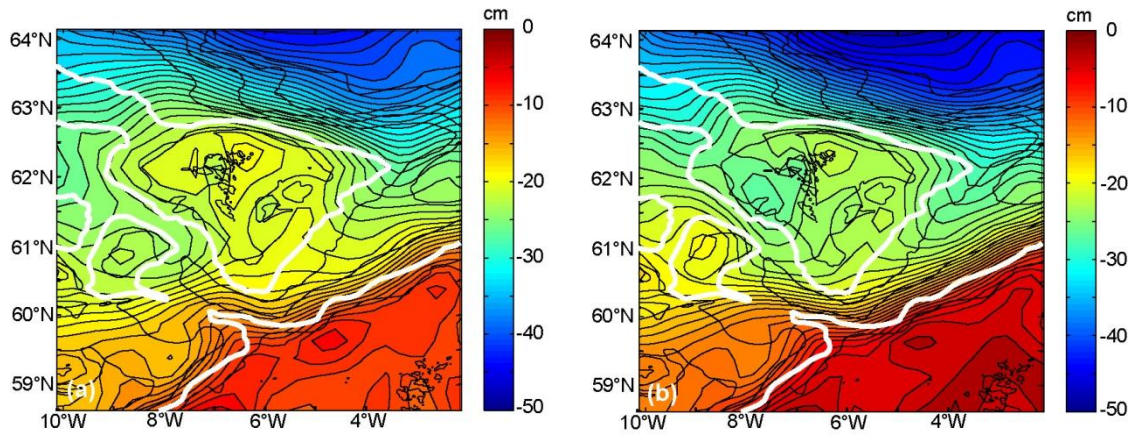

**Figure S7.** **(a)** Average MDT+SLA\* when  $\Delta h_{FBC} \geq +1$  standard deviation. **(b)** Average MDT+SLA\* when  $\Delta h_{FBC} \leq -1$  standard deviation. The thick white lines indicate the 500 m bottom contour.

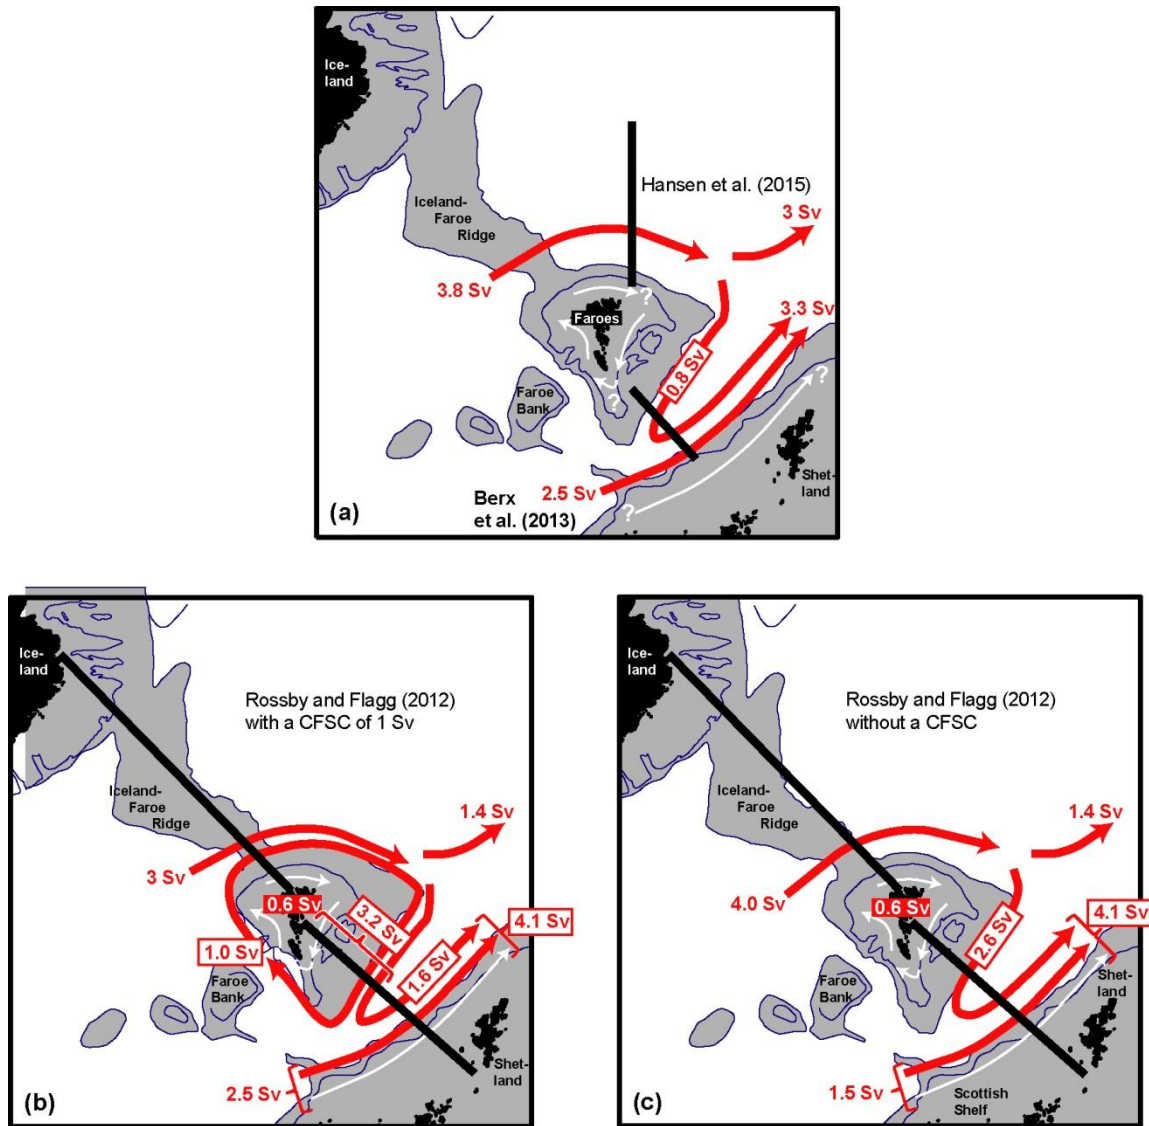

**Figure S8.** Atlantic inflow between Iceland and Scotland (thick red arrows) March 2008 to March 2011 in three recent studies using two different methods. **(a)** According to Berx et al. (2013) and Hansen et al. (2015). **(b, c)** According to Rossby and Flagg (2012) with **(b)** and without **(c)** a Circum-Faroe Slope Current (CFSC) of 1 Sv. Rossby and Flagg (2012) find a closed circulation on the Faroe Shelf of 0.6 Sv (white arrows), which is not included in the estimates by Berx et al. (2013) and Hansen et al. (2015). In addition, Rossby and Flagg (2012) assume a closed CFSC of 1 Sv **(b)**, which implies an inflow to the FSC from the West of 2.5 Sv in close agreement with Berx et al. (2013). Without the CFSC **(c)**, the inflow from the West is reduced to 1.5 Sv including flow over the Scottish Shelf that is not included in Berx et al. (2013).
